# Supplementary material for: Functional instability allows access to DNA in longer transcription Activator-Like effector (TALE) arrays
Source: eLife journal article supplement (doi:10.7554/elife.38298), 2019-02-27

**A**

100 pM dsDNA unbound dwell times

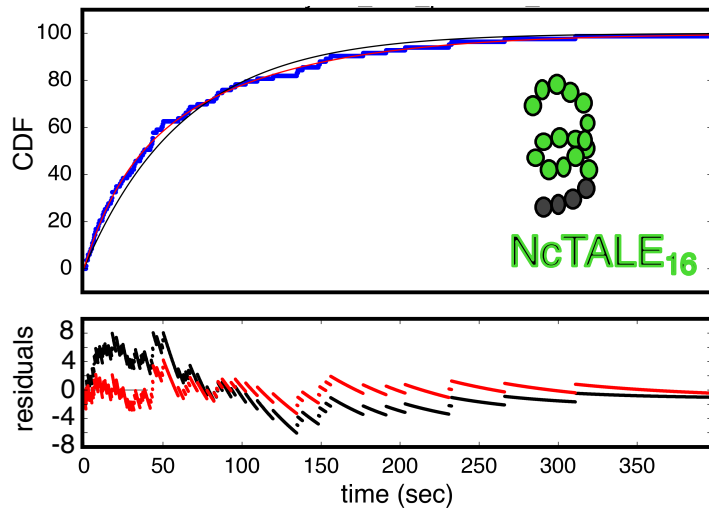**B**

5 nM dsDNA unbound dwell times

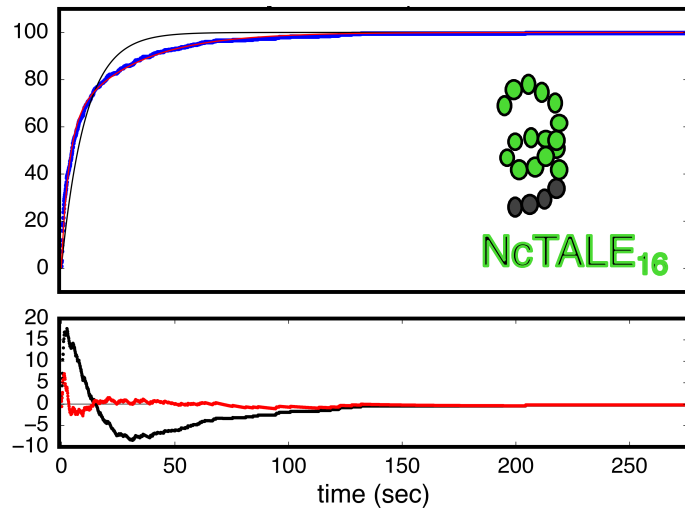**C**

5 nM dsDNA bound dwell times

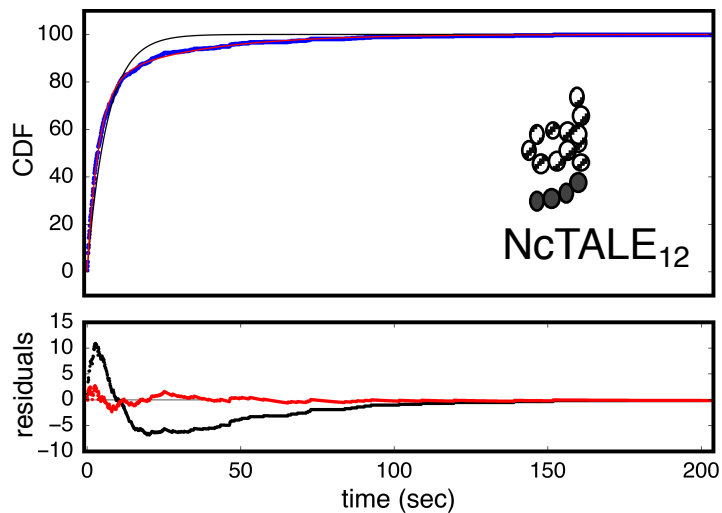**D**

5 nM dsDNA bound dwell times

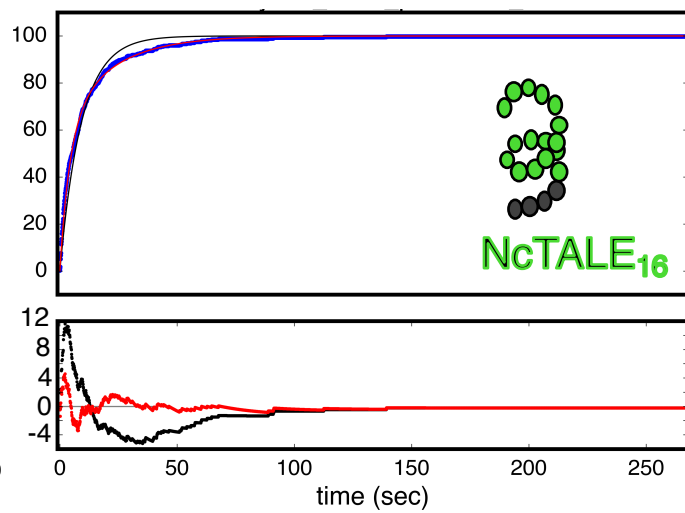

Supplement: supp [file elife-38298-supp-v1.zip]
