# Supplementary material for: Functional instability allows access to DNA in longer transcription Activator-Like effector (TALE) arrays
Source: eLife journal article supplement (doi:10.7554/elife.38298), 2019-02-27

**A**On transitions ( $\text{FRET}_{\text{L} \rightarrow \text{H}}$ )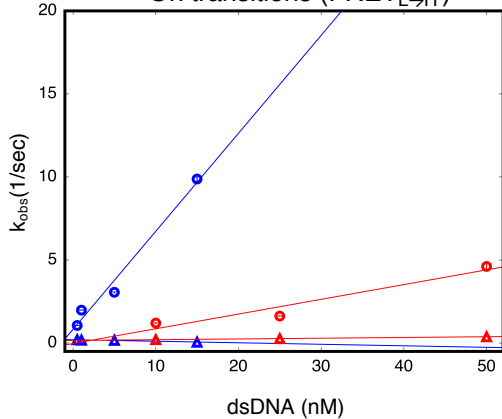**B**Off transitions ( $\text{FRET}_{\text{H} \rightarrow \text{L}}$ )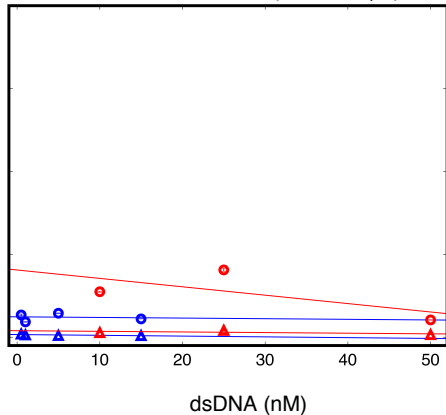

Supplement: supp [file elife-38298-supp-v1.zip]
