# Supplementary figures and images for: Functional instability allows access to DNA in longer transcription Activator-Like effector (TALE) arrays
Source: eLife journal article supplement (doi:10.7554/elife.38298), 2019-02-27

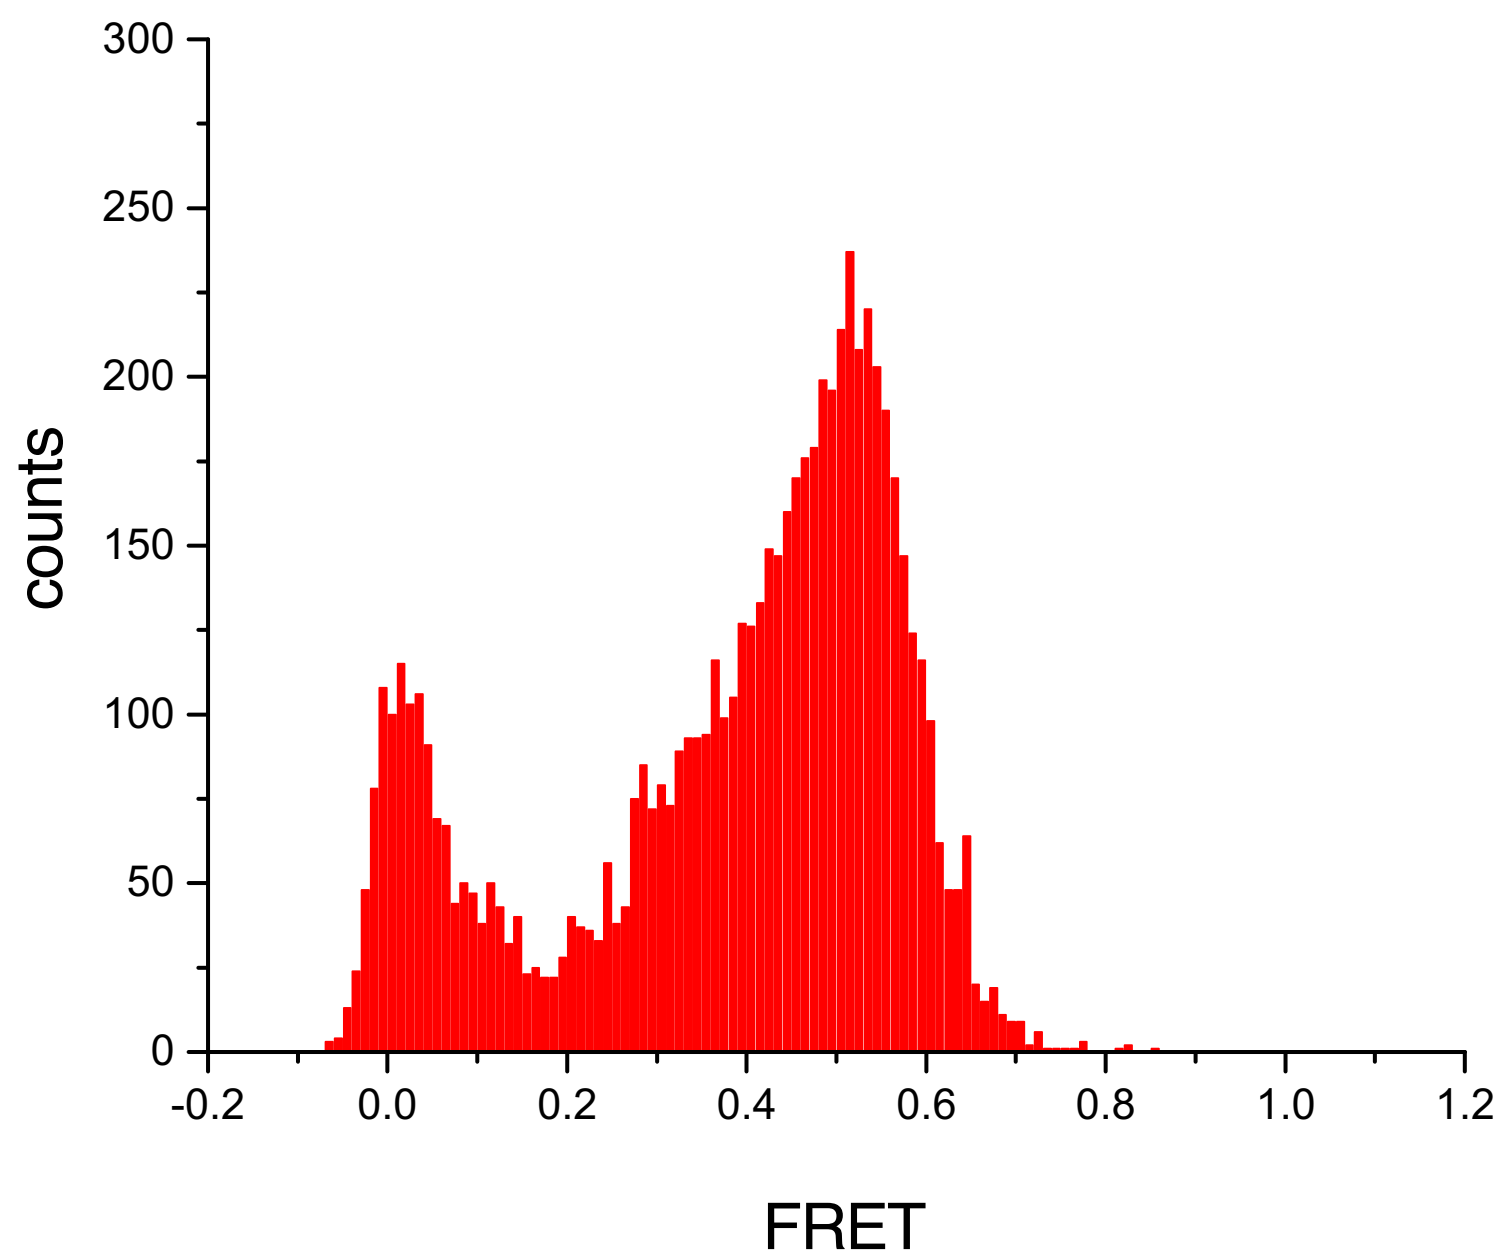

Supplement: supp [file elife-38298-supp-v1.zip]

A

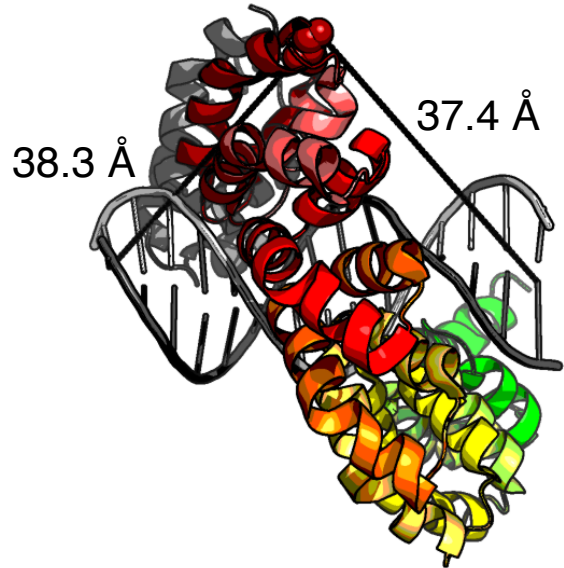

B

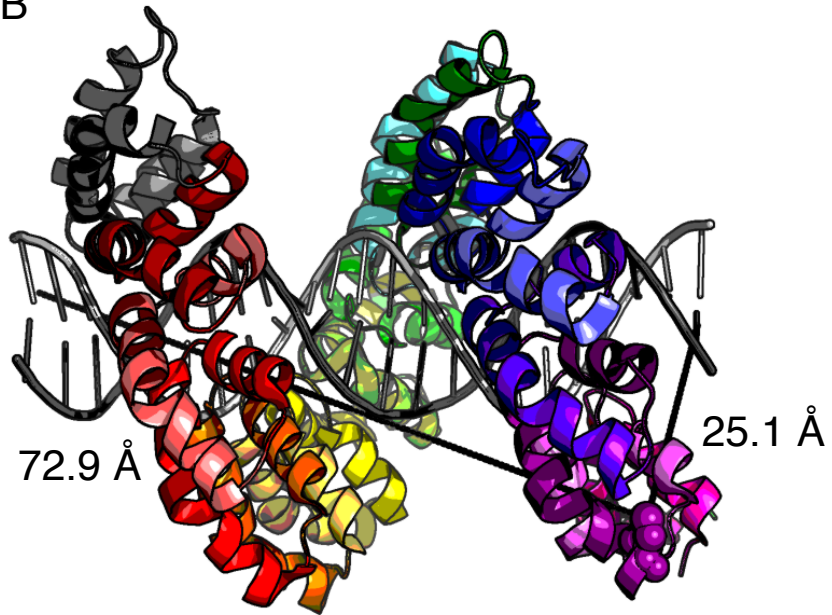

Supplement: supp [file elife-38298-supp-v1.zip]

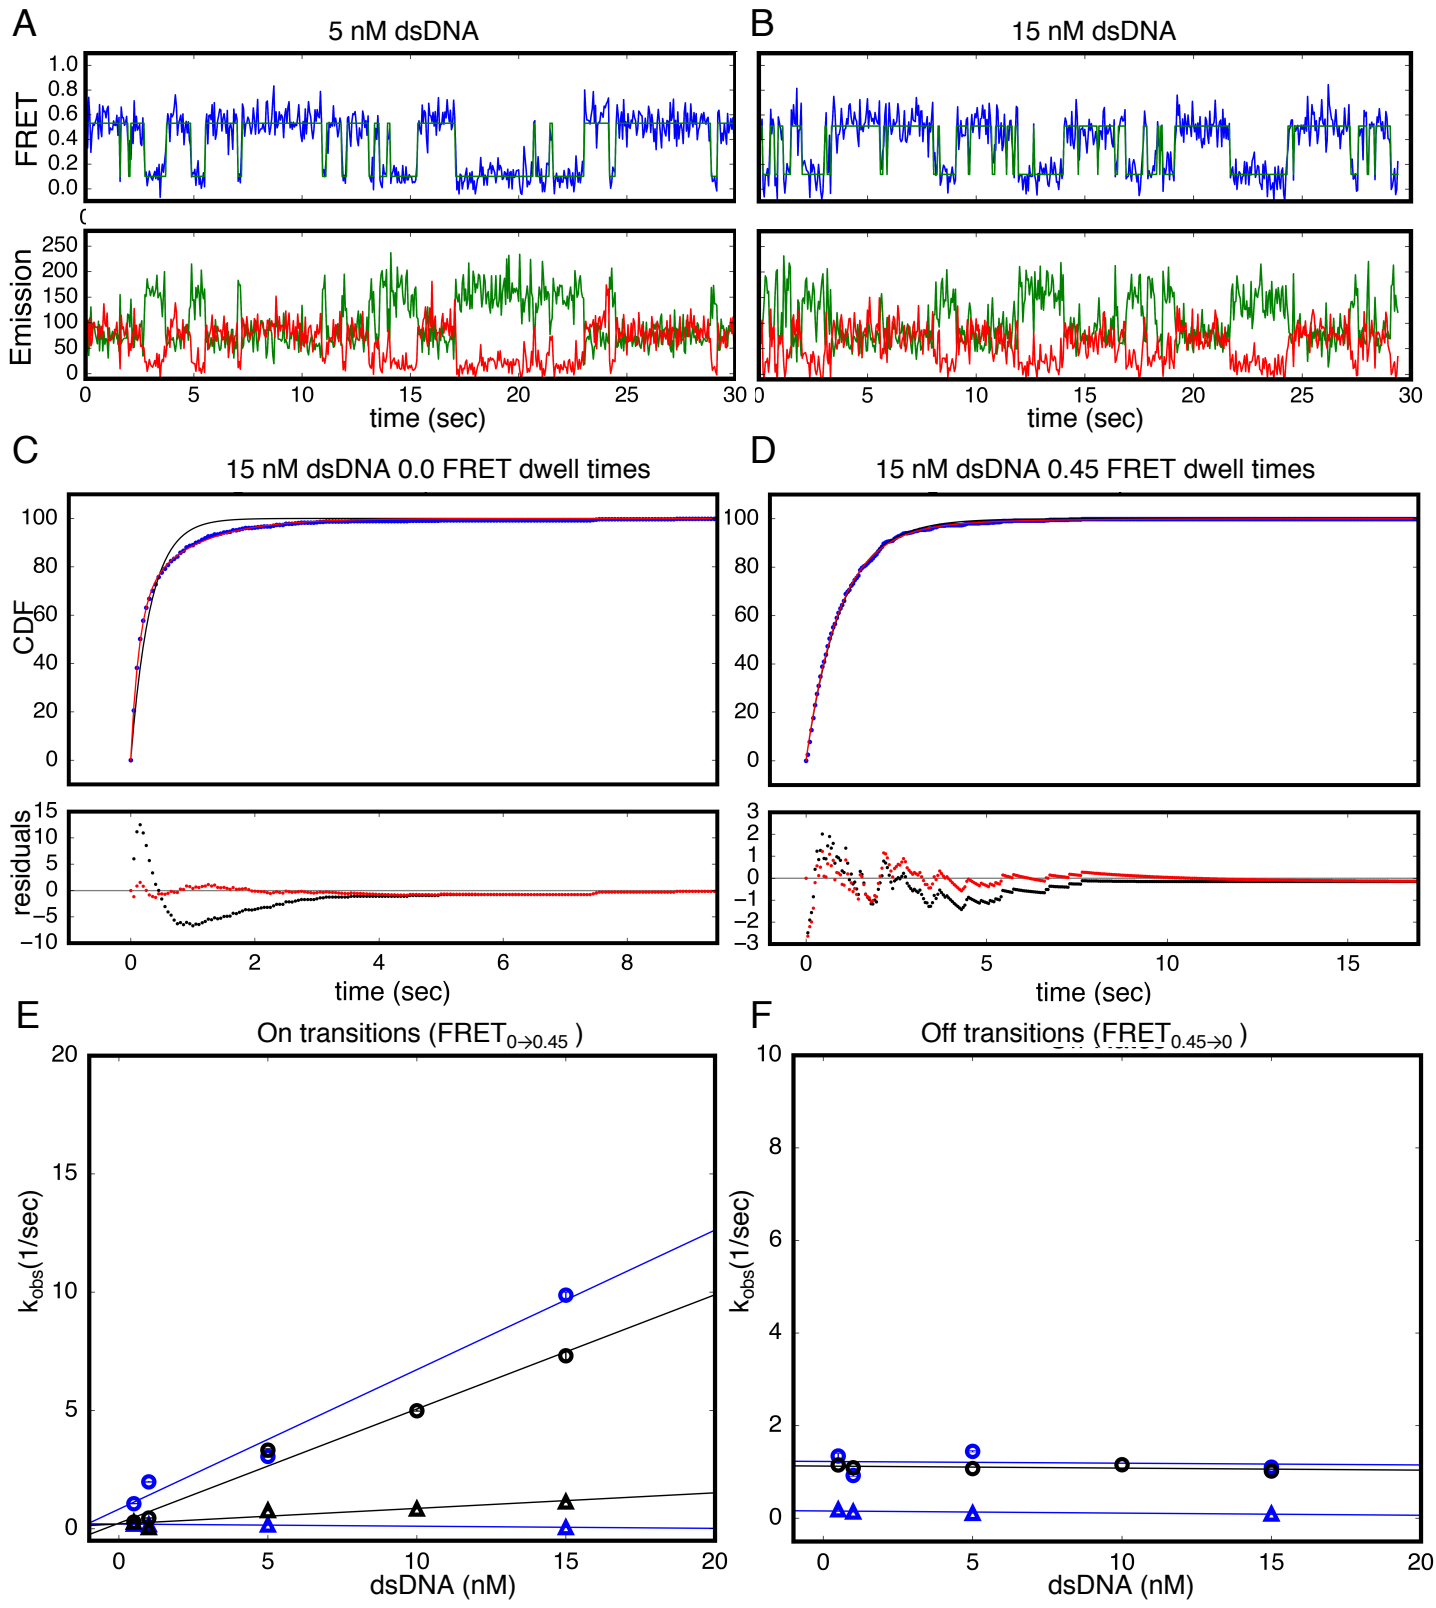

Supplement: supp [file elife-38298-supp-v1.zip]

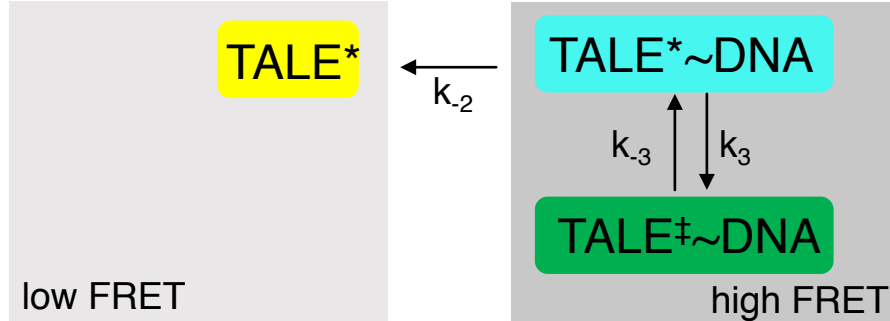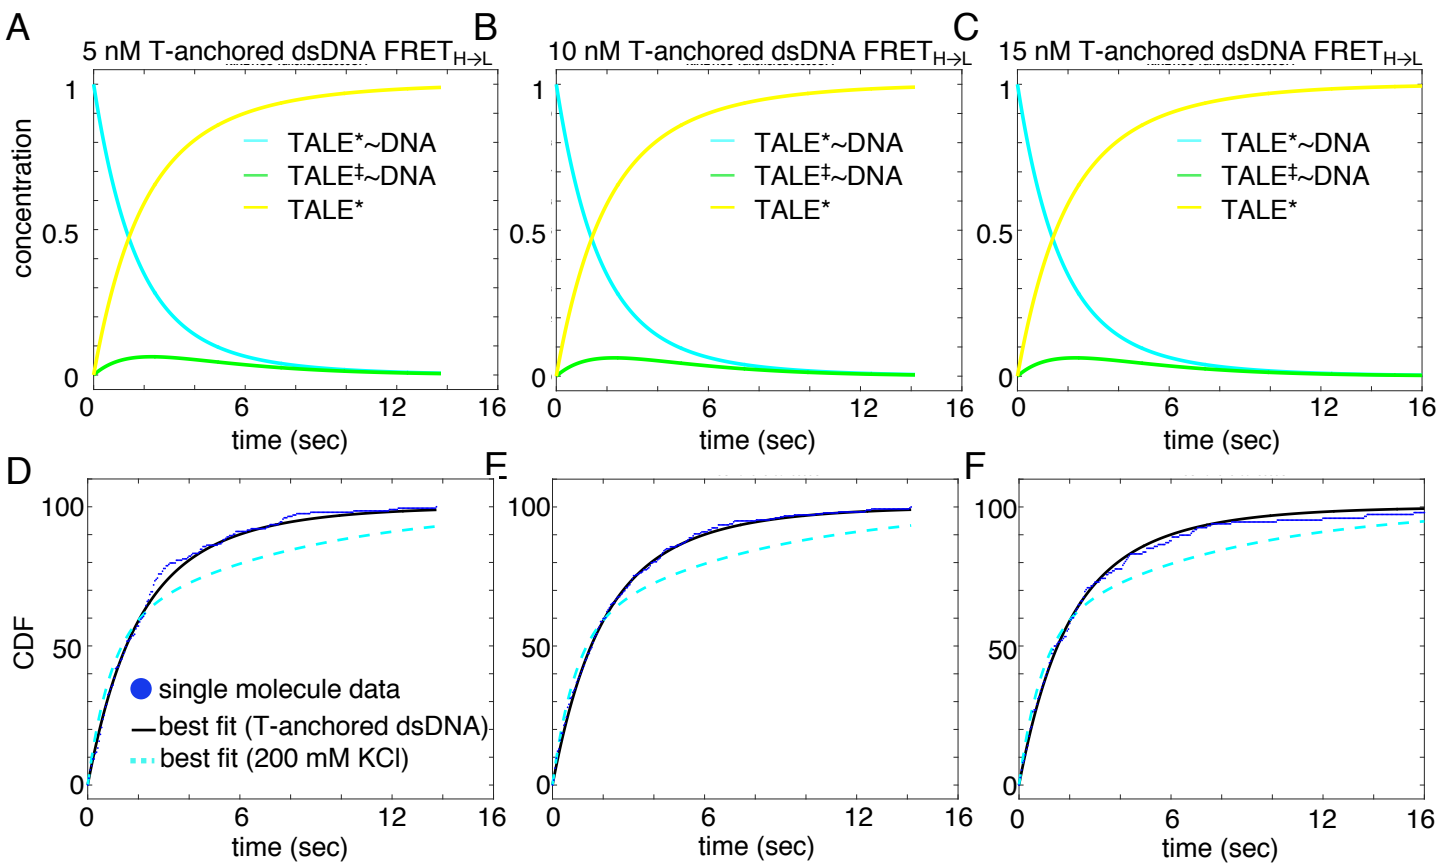

Supplement: supp [file elife-38298-supp-v1.zip]

**A**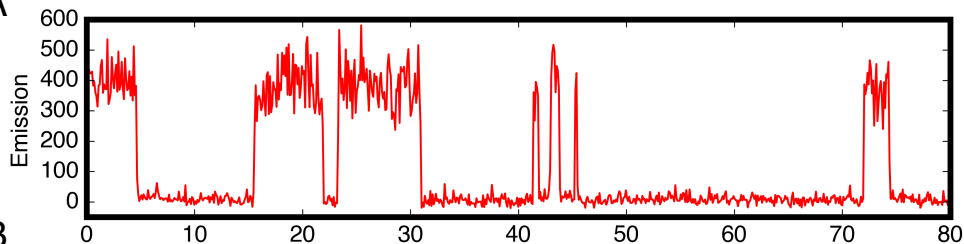**B**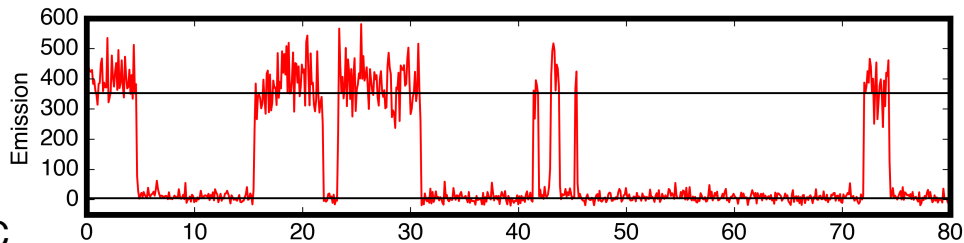**C**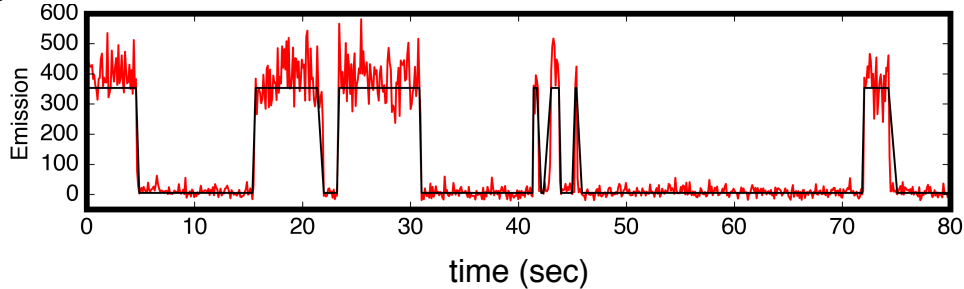

Supplement: supp [file elife-38298-supp-v1.zip]

laser      detection  
channel

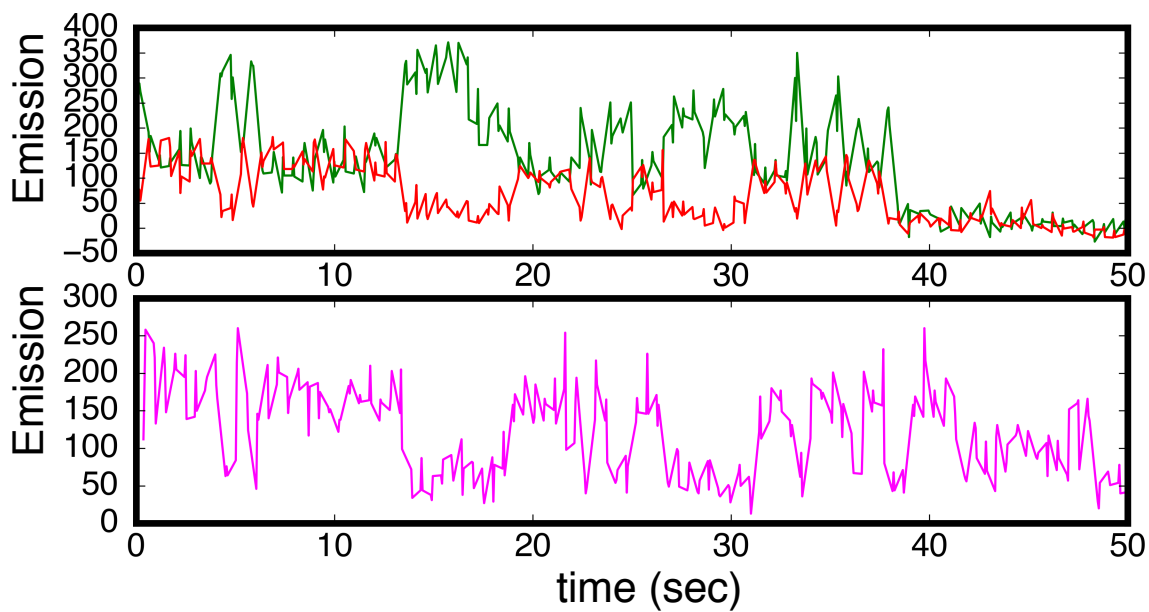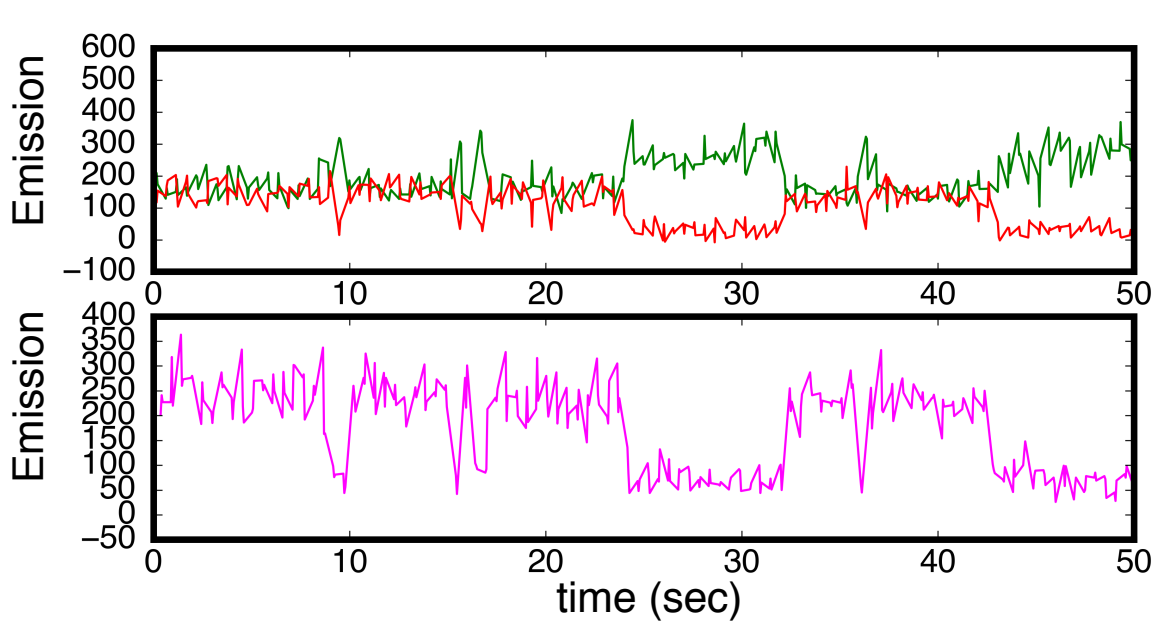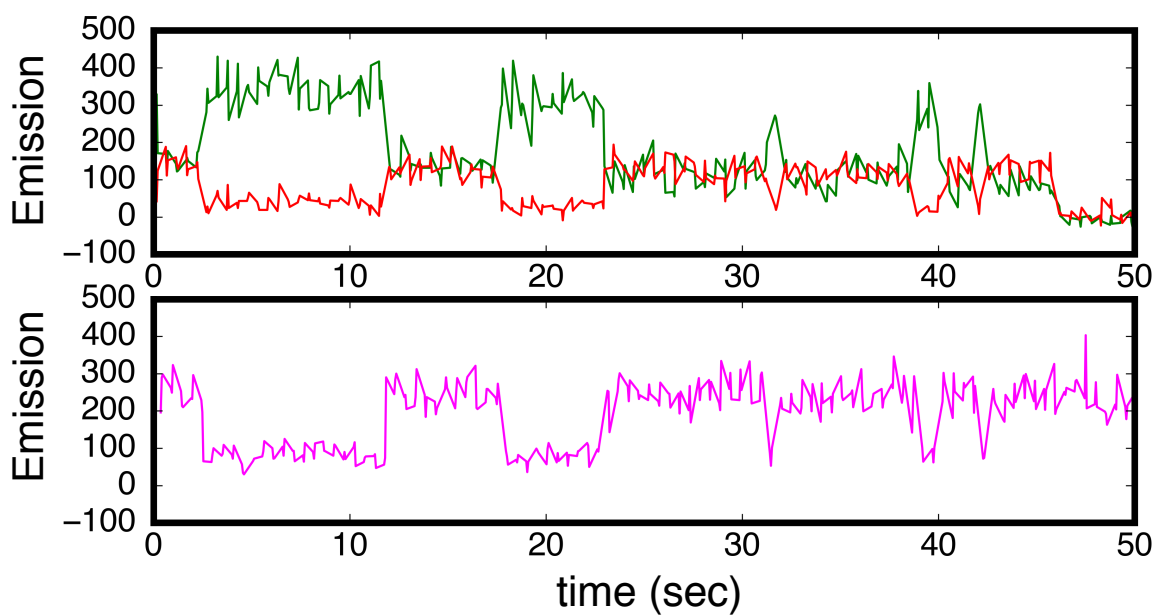

Supplement: supp [file elife-38298-supp-v1.zip]

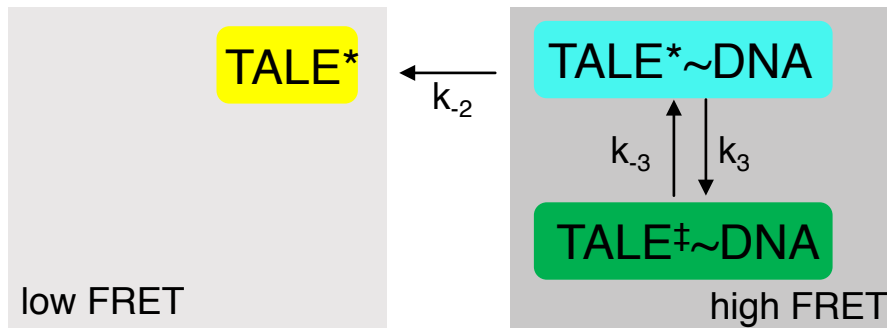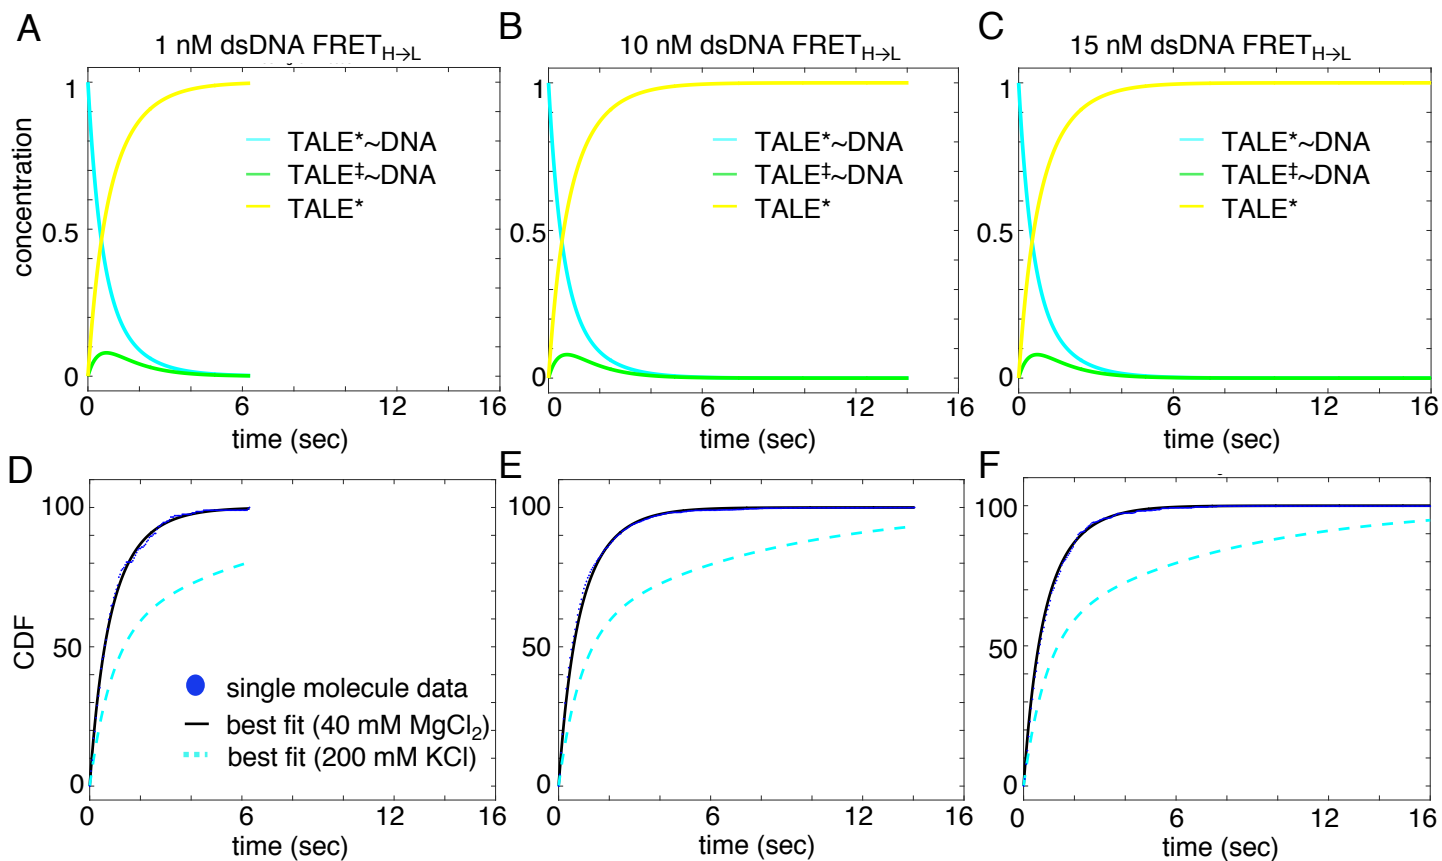

Supplement: supp [file elife-38298-supp-v1.zip]
